# Supplementary material for: Selective Expansion of NKG2C+ Adaptive NK Cells Using K562 Cells Expressing HLA-E
Source: MDPI journal article supplement (doi:10.3390/ijms23169426), 2022-08-20
Supplement: s1 [file s1]

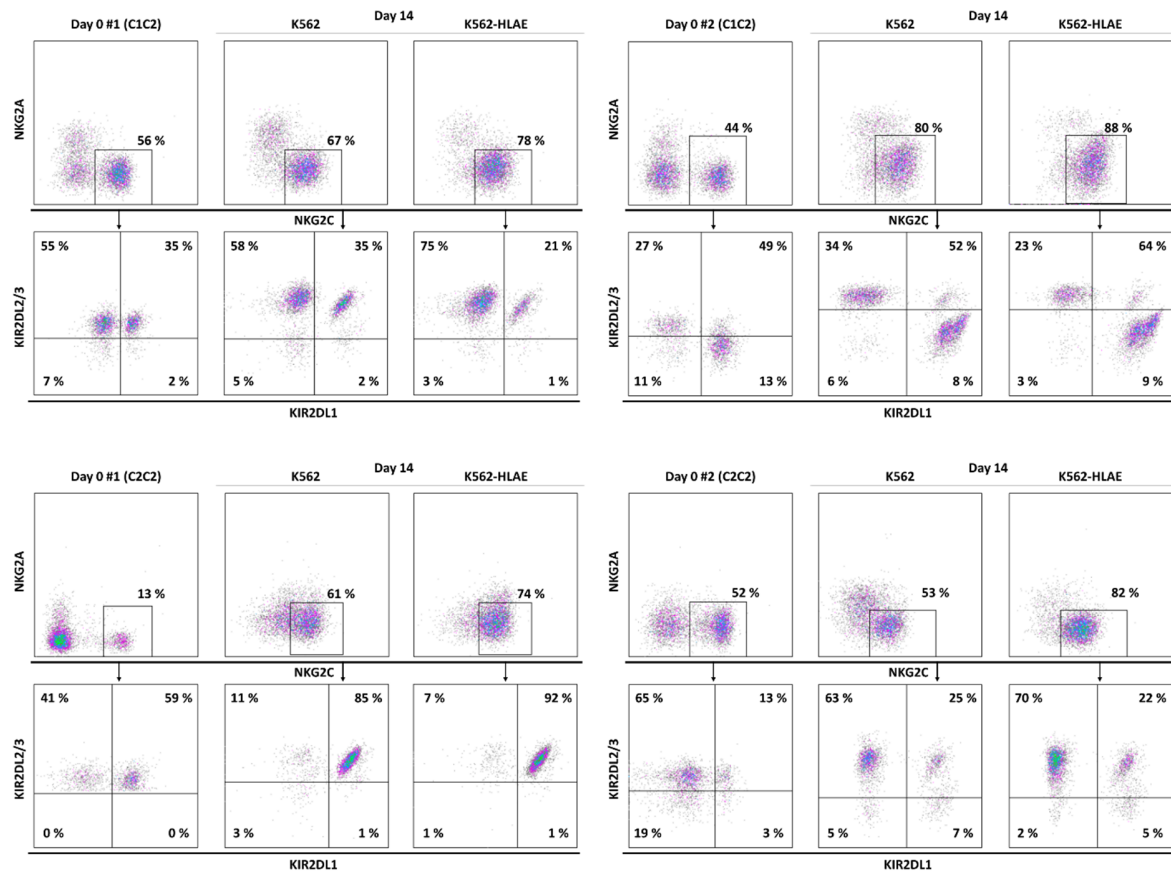

**Supplementary Figure S1.** Expansion of NK cells from C1C2 and C2C2 donors.

Representative FACS dot plot showing the frequency of NKG2C, NKG2A, KIR2DL1, KIR2DL2/3 in two C1C2 and two C2C2 donors before and after expansion with K562 or K562-HLA-E feeder cells
